# Supplementary material for: Molecular dynamics investigations of regioselectivity of anionic/aromatic substrates by a family of enzymes: a case study of diclofenac binding in CYP2C isoforms
Source: Royal Society of Chemistry journal article supplement (doi:10.1039/c6cp01128d), 2016-01-01

## SUPPORTING INFORMATION

### **Molecular Dynamics Investigations of Regioselectivity of Anionic/Aromatic Substrates by a Family of Enzymes: A Case Study of Diclofenac Binding in CYP2C Isoforms**

*YingLu Cui*<sup>a</sup>, *Fang Xu*<sup>a</sup>, and *Rongling Wu*<sup>\*a, b</sup>

<sup>a</sup>Center for Computational Biology, College of Biological Sciences and Biotechnology, Beijing Forestry University, Beijing, 100083, China;

<sup>b</sup>Center for Statistical Genetics, The Pennsylvania State University, Hershey, PA 17033, USA

**Correspondence:** Professor R Wu, Center for Computational Biology, College of Biological Sciences and Biotechnology, Beijing Forestry University, Beijing, 100083, China. E-mail: [rwu@phs.psu.edu](mailto:rwu@phs.psu.edu)

**Table S1.** The binding free energies calculated with different polar solvation models and solute dielectric constants (Energy unit: kcal/mol, with standard deviations)

| systems            | GB <sup>HCT</sup> (igb=1) |                     |                     | GB <sup>OBC1</sup> (igb=2) |                     |                     | GB <sup>OBC2</sup> (igb=5) |                     |                     |
|--------------------|---------------------------|---------------------|---------------------|----------------------------|---------------------|---------------------|----------------------------|---------------------|---------------------|
|                    | $\epsilon_{in} = 1$       | $\epsilon_{in} = 2$ | $\epsilon_{in} = 4$ | $\epsilon_{in} = 1$        | $\epsilon_{in} = 2$ | $\epsilon_{in} = 4$ | $\epsilon_{in} = 1$        | $\epsilon_{in} = 2$ | $\epsilon_{in} = 4$ |
| CYP2C9_in108_4'oh  | -13.3±3.0                 | -12.5±2.3           | -12.2±2.5           | -12.2±2.0                  | -12.2±2.5           | -12.4±2.6           | -12.3±3.2                  | -11.4±2.6           | -10.5±2.6           |
| CYP2C19_in108_4'oh | -4.6±3.6                  | -5.1±2.7            | -5.5±2.6            | -4.7±1.0                   | -5.1±2.6            | -5.8±2.6            | -5.0±3.4                   | -5.7±2.8            | -5.8±2.7            |
| CYP2C8_o108_5oh    | -8.5±1.8                  | -8.7±1.9            | -9.3±2.0            | -7.7±1.7                   | -8.1±1.8            | -8.8±2.0            | -8.2±1.9                   | -8.4±1.8            | -8.7±1.9            |
| R <sup>2</sup>     | 0.77                      | 0.72                | 0.58                | 0.84                       | 0.80                | 0.78                | 0.79                       | 0.74                | 0.50                |

**Table S2.** Decomposition of binding free energy (kcal mol<sup>-1</sup>) on per-residue basis for CYP2C9\_in108\_4'oh, CYP2C19\_in108\_4'oh, and CYP2C8\_o108\_5oh complexes

(A) CYP2C9\_in108\_4'oh complex

| Residue | $\Delta E_{\text{vdw}}$ | $\Delta E_{\text{ele}}$ | $\Delta E_{\text{GB}}$ | $\Delta G_{\text{SASA}}$ | $\Delta G_{\text{bind}}$ |
|---------|-------------------------|-------------------------|------------------------|--------------------------|--------------------------|
| Arg108  | 0.74                    | -5.79                   | 1.75                   | -0.23                    | -3.53                    |
| Phe476  | -1.44                   | -0.88                   | 0.77                   | -0.25                    | -1.80                    |
| Leu208  | -1.00                   | -0.39                   | 0.20                   | -0.13                    | -1.32                    |
| Asn204  | -0.88                   | 0.33                    | -0.61                  | -0.13                    | -1.29                    |
| Leu362  | -1.00                   | -0.45                   | 0.36                   | -0.13                    | -1.22                    |
| Leu366  | -0.83                   | -1.01                   | 0.91                   | -0.16                    | -1.09                    |
| Phe114  | -0.84                   | -0.62                   | 0.73                   | -0.08                    | -0.81                    |
| Thr301  | -0.78                   | -0.86                   | 0.92                   | -0.06                    | -0.78                    |
| Ala477  | -0.55                   | -0.17                   | 0.06                   | -0.08                    | -0.74                    |
| Phe100  | -0.52                   | -0.20                   | 0.13                   | -0.04                    | -0.63                    |
| Ile205  | -0.62                   | 0.35                    | -0.28                  | -0.05                    | -0.60                    |
| Leu361  | -0.63                   | 0.67                    | -0.60                  | -0.03                    | -0.59                    |
| Val113  | -0.25                   | -1.15                   | 0.96                   | -0.03                    | -0.47                    |
| HEM500  | -0.70                   | 23.35                   | -23.09                 | -0.03                    | -0.47                    |

(B) CYP2C19\_in108\_4'oh complex

| Residue | $\Delta E_{\text{vdw}}$ | $\Delta E_{\text{ele}}$ | $\Delta G_{\text{GB}}$ | $\Delta G_{\text{SASA}}$ | $\Delta G_{\text{bind}}$ |
|---------|-------------------------|-------------------------|------------------------|--------------------------|--------------------------|
| Asn204  | -0.10                   | -4.51                   | 2.89                   | -0.12                    | -1.84                    |
| Phe114  | -1.30                   | -1.09                   | 1.07                   | -0.16                    | -1.48                    |
| Gly296  | -0.87                   | -2.43                   | 2.11                   | -0.08                    | -1.27                    |
| Ala297  | -1.54                   | -0.26                   | 0.75                   | -0.16                    | -1.21                    |
| Phe476  | -1.18                   | -1.22                   | 1.44                   | -0.24                    | -1.20                    |
| Arg108  | -1.01                   | -29.15                  | 29.13                  | -0.16                    | -1.19                    |
| HEM500  | -2.17                   | 23.68                   | -22.53                 | -0.08                    | -1.10                    |

|        |       |       |        |       |       |
|--------|-------|-------|--------|-------|-------|
| Leu366 | -0.95 | -0.74 | 0.70   | -0.10 | -1.09 |
| Glu300 | -0.77 | 16.39 | -16.35 | -0.08 | -0.81 |
| Asp293 | -1.06 | 25.38 | -25.01 | -0.03 | -0.72 |
| Thr301 | -0.62 | -1.43 | 1.41   | -0.05 | -0.69 |
| Val113 | -0.72 | -0.07 | 0.20   | -0.07 | -0.66 |
| Ile362 | -0.50 | -0.18 | 0.15   | -0.06 | -0.59 |
| Phe100 | -0.32 | -0.12 | 0.04   | -0.03 | -0.43 |

(C) CYP2C8\_o108\_5oh complex

| Residue | $\Delta E_{\text{vdw}}$ | $\Delta E_{\text{ele}}$ | $\Delta G_{\text{GB}}$ | $\Delta G_{\text{SASA}}$ | $\Delta G_{\text{bind}}$ |
|---------|-------------------------|-------------------------|------------------------|--------------------------|--------------------------|
| Phe205  | -1.99                   | -0.14                   | 0.18                   | -0.25                    | -2.20                    |
| Val366  | -1.44                   | -0.37                   | 0.26                   | -0.30                    | -1.85                    |
| Val296  | -1.26                   | -1.44                   | 1.40                   | -0.16                    | -1.46                    |
| Thr301  | -1.18                   | 0.04                    | -0.10                  | -0.12                    | -1.36                    |
| Ala297  | -1.18                   | -0.22                   | 0.30                   | -0.07                    | -1.17                    |
| Ile113  | -1.03                   | 0.01                    | 0.02                   | -0.17                    | -1.17                    |
| Val362  | -0.56                   | -0.14                   | -0.07                  | -0.08                    | -0.85                    |
| Val477  | -0.87                   | 0.32                    | -0.16                  | -0.12                    | -0.83                    |
| HEM500  | -0.98                   | -1.71                   | 1.98                   | -0.11                    | -0.82                    |
| Glu300  | -0.84                   | -1.84                   | 2.03                   | -0.09                    | -0.74                    |
| Leu361  | -0.68                   | 0.01                    | 0.17                   | -0.04                    | -0.54                    |
| Ile476  | -0.48                   | 0.13                    | -0.12                  | -0.06                    | -0.53                    |
| Leu208  | -0.33                   | -0.04                   | -0.03                  | -0.08                    | -0.48                    |

**Figure S1.** Binding characteristics of diclofenac for each CYP2C isoform. The crucial residues involved in ligand binding are shown in stick representation. Diclofenac in each conformer are shown in stick representation in blue and yellow, respectively. The black asterisk (\*) represents the metabolic site of diclofenac for each isoform.

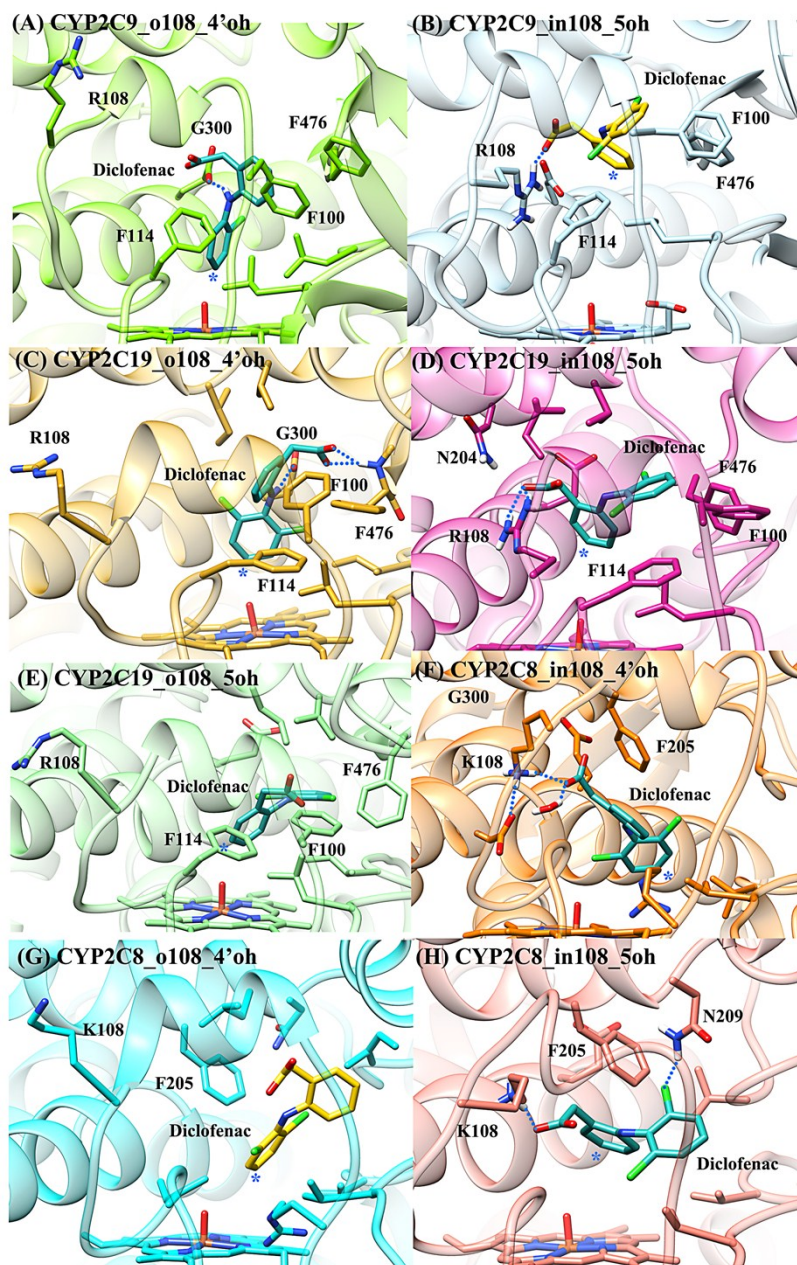

**Figure S2.** Time-dependent rms deviation values from the starting structures along the simulations for CYP2C enzymes.

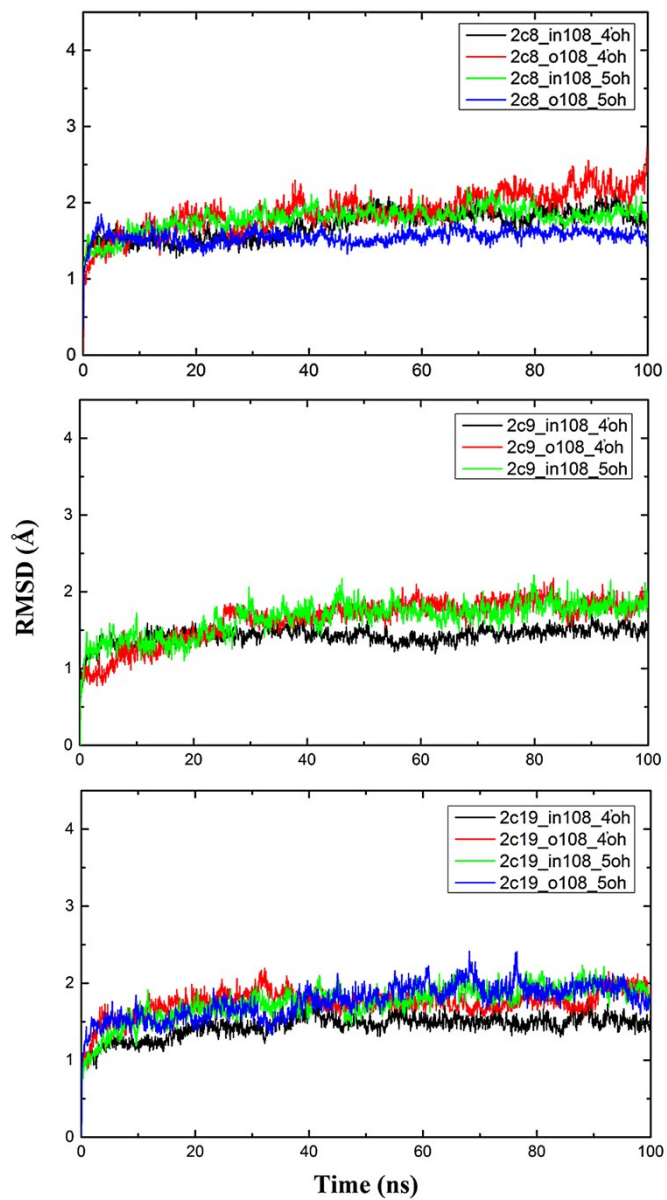

**Figure S3.** (A) Distinct local structural features of the B-C loop for CYP2C9\_in108\_4'oh (yellow), CYP2C19\_in108\_4'oh (salmon pink), and CYP2C8\_o108\_5oh (blue) complexes. (B) Relocation of the key pivot residues in the B-C loop of CYP2C9\_in108\_4'oh complex (yellow) compared with those of CYP2C19\_108\_4'oh complex (salmon pink).

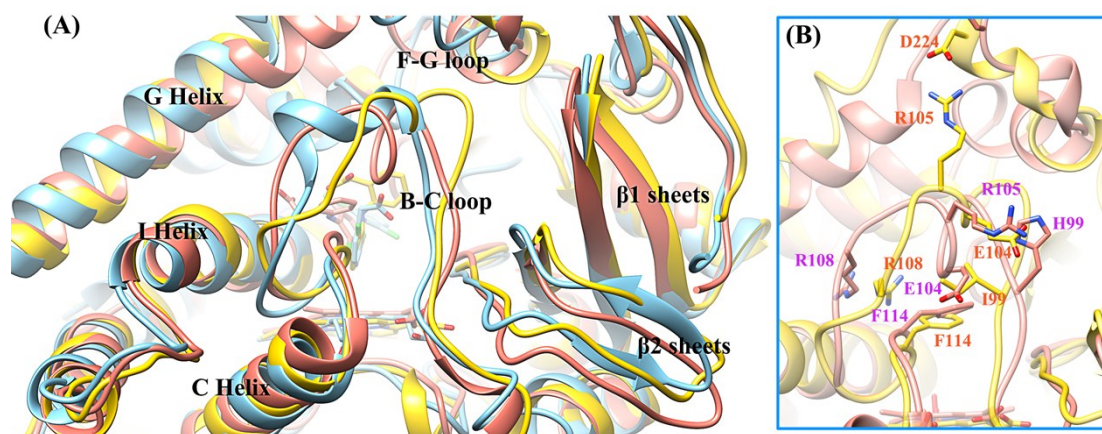

**Figure S4.** Distances between the centers of the aromatic groups of Phe226 and Trp212 in CYP2C9\_in108\_4'oh (black), CYP2C19\_in108\_4'oh (red), and CYP2C8\_o108\_5oh (green) complexes.

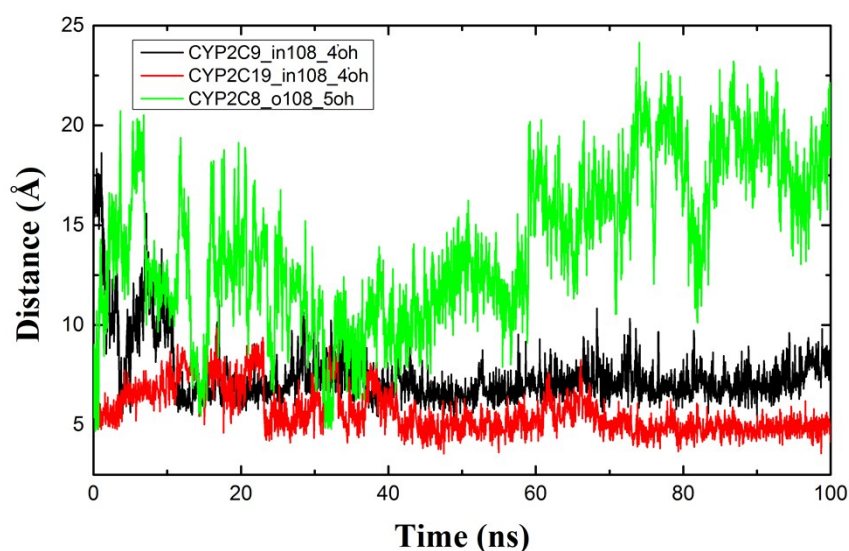

**Figure S5.** Variations of SASA values of HC1 along MD simulations for CYP2C9\_in108\_4'oh (black), CYP2C19\_in108\_4'oh (red), and CYP2C8\_o108\_5oh (green) complexes.

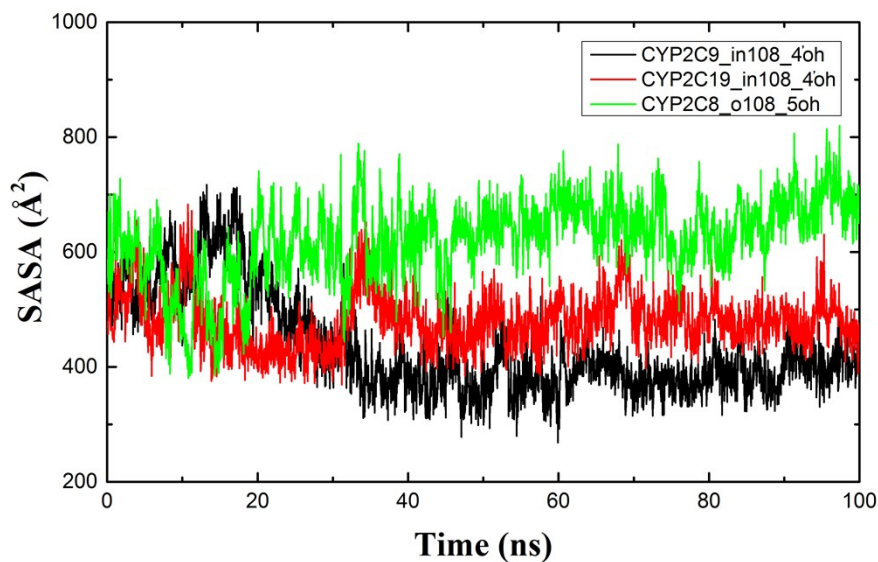

**Figure S6.** Diagram of the active site volumes for CYP2C isoforms. The volumes were calculated by online tool CASTp (<http://sts.bioe.uic.edu/castp/>).

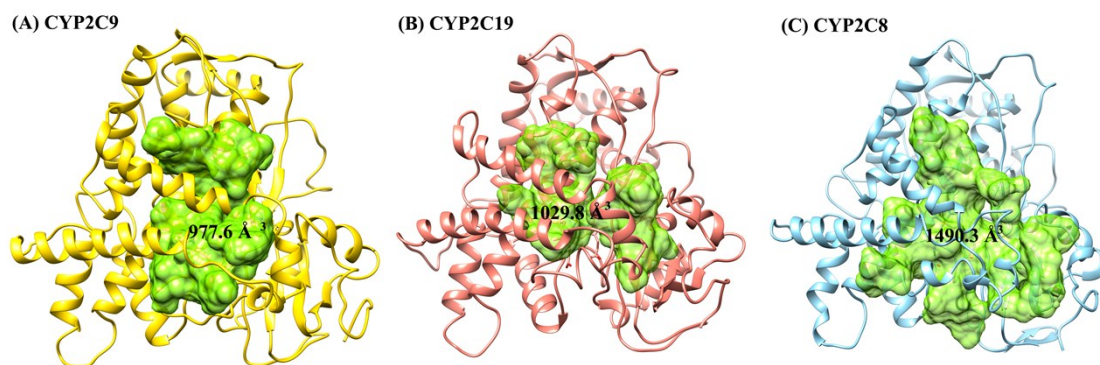

Supplement: c6cp01128d1.pdf [file c6cp01128d1.pdf]
